# Supplementary material for: Strain-induced magnetic phase transition, magnetic anisotropy switching and bilayer antiferromagnetic skyrmions in van der Waals magnet CrTe2
Source: Royal Society of Chemistry journal article supplement (doi:10.1039/d2nr04740c), 2022-12-13
Supplement: d2nr04740c1.pdf [file d2nr04740c1.pdf]

Cite this: DOI: 00.0000/xxxxxxxxxx

## Supplemental materials for "Strain-induced magnetic phase transition, magnetic anisotropy switching and bi-layer antiferromagnetic skyrmions in van der Waals magnet CrTe<sub>2</sub>"<sup>†</sup>

Dushuo Feng,<sup>‡a</sup> Zhong Shen,<sup>‡a</sup> Yufei Xue,<sup>a</sup> Zhihao Guan,<sup>a</sup> Runhu Xiao<sup>a</sup> and Changsheng Song<sup>\*ab</sup>

<sup>a</sup> Key Laboratory of Optical Field Manipulation of Zhejiang Province, Department of Physics, Zhejiang Sci-Tech University, Hangzhou, China. E-mail: cssong@zstu.edu.cn

<sup>b</sup> Longgang Institute of Zhejiang Sci-Tech University, Wenzhou, China.

<sup>‡</sup>These authors contributed equally.

# 1 Critical temperature of CrTe<sub>2</sub> monolayer under strain.

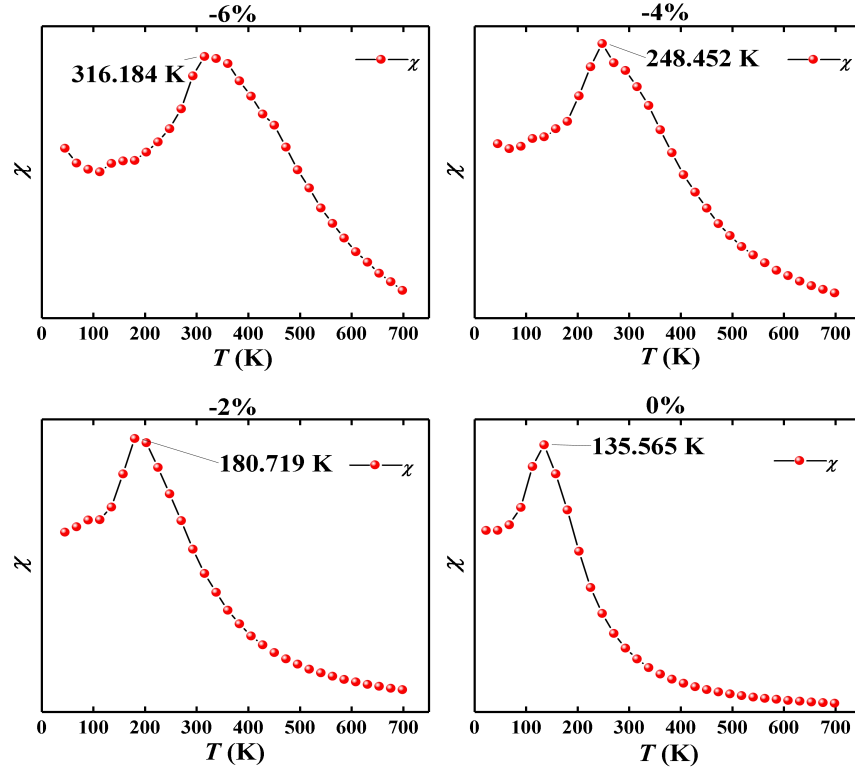

Fig. S1 The critical temperature ( $T_c$ ) of CrTe<sub>2</sub> monolayer without strain and with compressive strain.

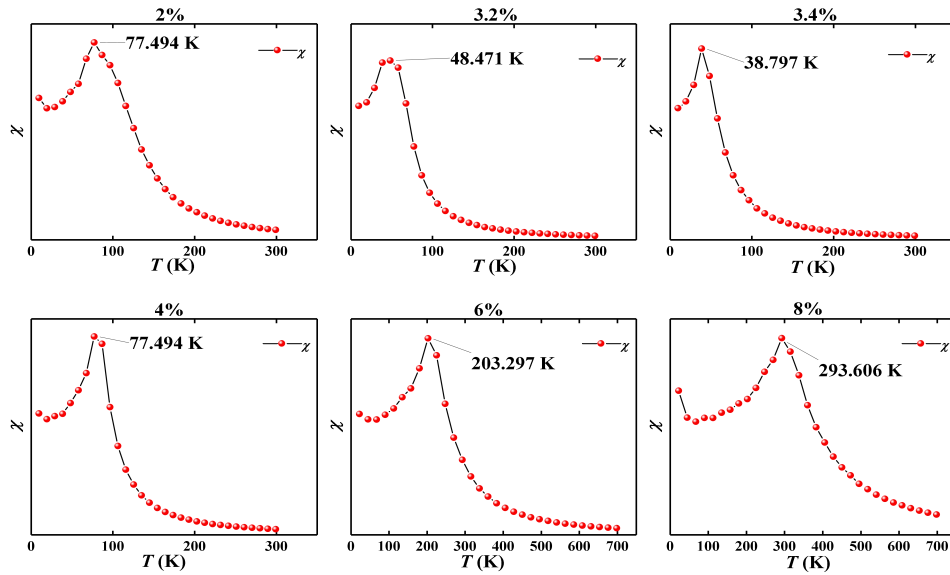

Fig. S2 The critical temperature ( $T_c$ ) of CrTe<sub>2</sub> monolayer with tensile strain.

**Table S1** Optimized lattice parameters  $a$ , Heisenberg exchange coefficients  $J_1$ ,  $J_2$ ,  $J_3$ , single-ion anisotropy  $K$  and the magnetic moments of Cr atoms in CrTe<sub>2</sub> monolayer with different biaxial strains.

| Strain (%) | $a$ (Å) | $J_1$ (meV) | $J_2$ (meV) | $J_3$ (meV) | $K$ (meV) | $M_{Cr}$ ( $\mu_B$ ) |
|------------|---------|-------------|-------------|-------------|-----------|----------------------|
| -6         | 3.40    | 38.41       | -8.00       | 11.43       | -2.14     | 2.95                 |
| -4         | 3.47    | 27.76       | -6.68       | 8.30        | -2.91     | 2.94                 |
| -2         | 3.55    | 18.96       | -5.43       | 6.28        | -2.98     | 2.97                 |
| 0          | 3.62    | 10.48       | -4.56       | 4.25        | -2.12     | 3.00                 |
| 2          | 3.69    | 2.99        | -3.94       | 2.66        | -1.34     | 3.04                 |
| 4          | 3.76    | -3.52       | -3.46       | 1.55        | -0.97     | 3.07                 |
| 6          | 3.84    | -11.07      | -3.65       | 0.78        | 0.17      | 3.09                 |
| 8          | 3.91    | -19.14      | -3.01       | 1.04        | 3.84      | 3.14                 |

## 2 The Heisenberg exchange and Dzyaloshinskii-Moriya interactions in bilayer CrTe<sub>2</sub>

According to Eq (S1) in the main text, the Heisenberg exchange interactions can be quantitatively estimated by calculating each total energy expression for various spin configurations as expressed below.

$$E_1 = (36J_1 + 36J_2 + 36J_3 + 6J_{z1} - 4J_{z2} - 12J_{z3})S^2 + E_0, \quad (S1)$$

$$E_2 = (-4J_1 - 12J_2 + 4J_3 + 6J_{z1} - 4J_{z2} - 12J_{z3})S^2 + E_0, \quad (S2)$$

$$E_3 = (4J_1 - 12J_2 + 4J_3 + 2J_{z1} - 4J_{z2} - 12J_{z3})S^2 + E_0, \quad (S3)$$

$$E_4 = (-4J_1 - 12J_2 + 4J_3 + 2J_{z1} + 0J_{z2} - 8J_{z3})S^2 + E_0, \quad (S4)$$

$$E_5 = (-4J_1 - 12J_2 + 4J_3 + 2J_{z1} + 4J_{z2} - 12J_{z3})S^2 + E_0, \quad (S5)$$

$$E_6 = (0J_1 - 12J_2 + 4J_3 + 4J_{z1} + 0J_{z2} - 12J_{z3})S^2 + E_0, \quad (S6)$$

$$E_7 = (0J_1 - 4J_2 + 4J_3 + 2J_{z1} - 4J_{z2} - 12J_{z3})S^2 + E_0. \quad (S7)$$

Here,  $J_1$ ,  $J_2$ ,  $J_3$  are the Heisenberg exchange coefficients of first, second and third nearest neighbor of Cr atoms in the same layer,  $J_{z1}$ ,  $J_{z2}$ ,  $J_{z3}$  are the Heisenberg exchange coefficients of first, second and third nearest neighbor of Cr atoms in different layers,  $K$  is the single-ion anisotropy and  $E_0$  is the non-magnetic section of the total energy. The calculated magnetic parameters are listed in Tab. S2

We choose the four states energy mapping method to calculate the Dzyaloshinskii-Moriya interaction (DMI) in bilayer CrTe<sub>2</sub>. Take the  $x$  component of DMI ( $d_x$ ) as an example. We choose a pair of the nearest Cr atoms labeled  $\vec{S}_1$  and  $\vec{S}_2$  to set the four spin configurations as shown in Tab. S3. Notice that the spins of all the other spin sites are the same and are along the Z direction. Then,  $d_x$  can be obtained by:

$$d_x = \frac{E_1 + E_4 - E_2 - E_3}{4S^2}. \quad (S8)$$

The calculated  $d_x$ ,  $d_y$  and  $d_z$  are listed in Tab. S2

**Table S2** Heisenberg exchange coefficients and DMI of bilayer CrTe<sub>2</sub>.

| $J_1$ (meV) | $J_2$ (meV) | $J_3$ (meV) | $J_{z1}$ (meV) | $J_{z2}$ (meV) | $J_{z3}$ (meV) | $d_x$ (meV) | $d_y$ (meV) | $d_z$ (meV) |
|-------------|-------------|-------------|----------------|----------------|----------------|-------------|-------------|-------------|
| -1.69       | -0.70       | -2.54       | 1.25           | 0.78           | 0.44           | 0.54        | 0.56        | 1.33        |

**Table S3** Spin configurations used to calculate  $d_x$ ,  $d_y$  and  $d_z$ .

| DMI States | $d_x$ (meV) |          | $d_y$ (meV) |          | $d_z$ (meV) |          |
|------------|-------------|----------|-------------|----------|-------------|----------|
|            | S1          | S2       | S1          | S2       | S1          | S2       |
| 1          | (0,S,0)     | (0,0,S)  | (0,0,S)     | (S,0,0)  | (S,0,0)     | (0,S,0)  |
| 2          | (0,S,0)     | (0,0,-S) | (0,0,S)     | (-S,0,0) | (S,0,0)     | (0,-S,0) |
| 3          | (0,-S,0)    | (0,0,S)  | (0,0,-S)    | (S,0,0)  | (-S,0,0)    | (0,S,0)  |
| 4          | (0,-S,0)    | (0,0,-S) | (0,0,-S)    | (-S,0,0) | (-S,0,0)    | (0,-S,0) |
